# Supplementary material for: Insight into the synergism between MnO2 and acid sites over Mn–SiO2@TiO2 nano-cups for low-temperature selective catalytic reduction of NO with NH3
Source: Royal Society of Chemistry journal article supplement (doi:10.1039/c7ra11868f), 2018-01-01
Supplement: c7ra11868f1.pdf [file c7ra11868f1.pdf]

**Supporting Information**

**Insight into the synergism between MnO<sub>2</sub> and Acid  
Sites over Mn-SiO<sub>2</sub>@TiO<sub>2</sub> Nano-cups for Low-  
Temperature Selective Catalytic Reduction of NO  
with NH<sub>3</sub>**

**Siyi Zheng,<sup>a</sup> Lei Song,<sup>a</sup> Siyang Tang,<sup>a</sup> Changjun Liu,<sup>a,b</sup> Hairong Yue,<sup>a</sup>  
and Bin Liang<sup>a,b\*</sup>**

<sup>a</sup> Multi-phases Mass Transfer and Reaction Engineering Laboratory, School of  
Chemical Engineering, Sichuan University, Chengdu 610065, China

<sup>b</sup> Institute of New Energy and Low-Carbon Technology, Sichuan University, Chengdu  
610207, China

\*Corresponding author: [liangbin@scu.edu.cn](mailto:liangbin@scu.edu.cn), TEL/FAX: (+86) 22-85997677

## **Experimental section**

### ***Characterization methods***

The NO adsorption of the catalysts was detected using the temperature-programmed desorption of nitric oxide (NO-TPD) on a Quantachrome Autosorb-IQ-C chemisorption analyser. The sample powders were firstly pre-treated in pure He at 300 °C for 1h and then cooled down to 50 °C. The catalysts were constantly saturated in anhydrous NO (10% in He) at a flow rate of 30ml/min for 30min and the physical adsorption of NO was removed by He for 30min. Finally, the desorption was carried out by heating the samples from 50 to 400 °C at a heat rate of 10 °C/min.

### ***Catalyst test***

The oxidation of NO to NO<sub>2</sub> was measured in the same fixed-bed reactor as mentioned in the manuscript. The composition of reactants were as follows: 1000ppm NO, 5% O<sub>2</sub> and balance N<sub>2</sub>, with the total flow rate of 200 ml min<sup>-1</sup>. And the GHSV was also kept at 30000h<sup>-1</sup>.

**Table S1.** The physical properties of the 120h-stability-tested Mn-SiO<sub>2</sub>@TiO<sub>2</sub>-2.5 sample

| Catalysts                                                 | SSA <sup>[a]</sup><br>(m <sup>2</sup> g <sup>-1</sup> ) | Pore<br>volume <sup>[a]</sup> (cm <sup>3</sup> g <sup>-1</sup> ) | Pore<br>Diameter <sup>[a]</sup> (nm) |
|-----------------------------------------------------------|---------------------------------------------------------|------------------------------------------------------------------|--------------------------------------|
| Used Mn-SiO <sub>2</sub> @TiO <sub>2</sub> -2.5<br>sample | 64.49                                                   | 0.136                                                            | 11.98                                |

[a] Specific surface area (SSA) and pore volume by N<sub>2</sub>-adsorption method.

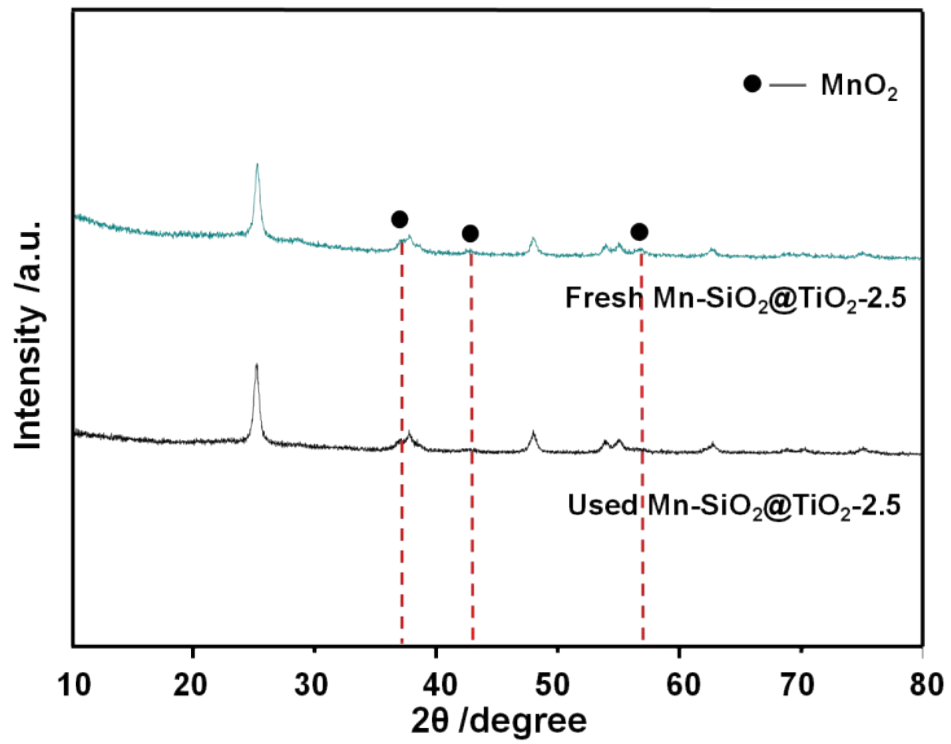

**Figure S1** XRD patterns of the fresh and stability-tested Mn-SiO<sub>2</sub>@TiO<sub>2</sub>-2.5 catalysts

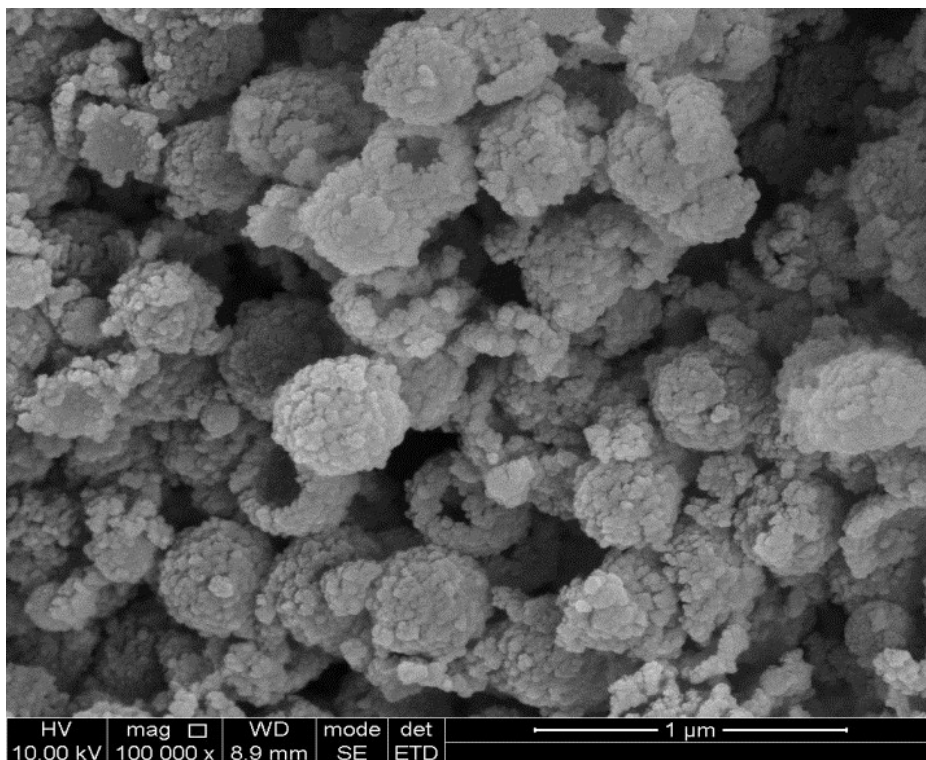

**Figure S2** SEM image of Mn-SiO<sub>2</sub>@TiO<sub>2</sub>-2.5 catalyst after 120h-stability test

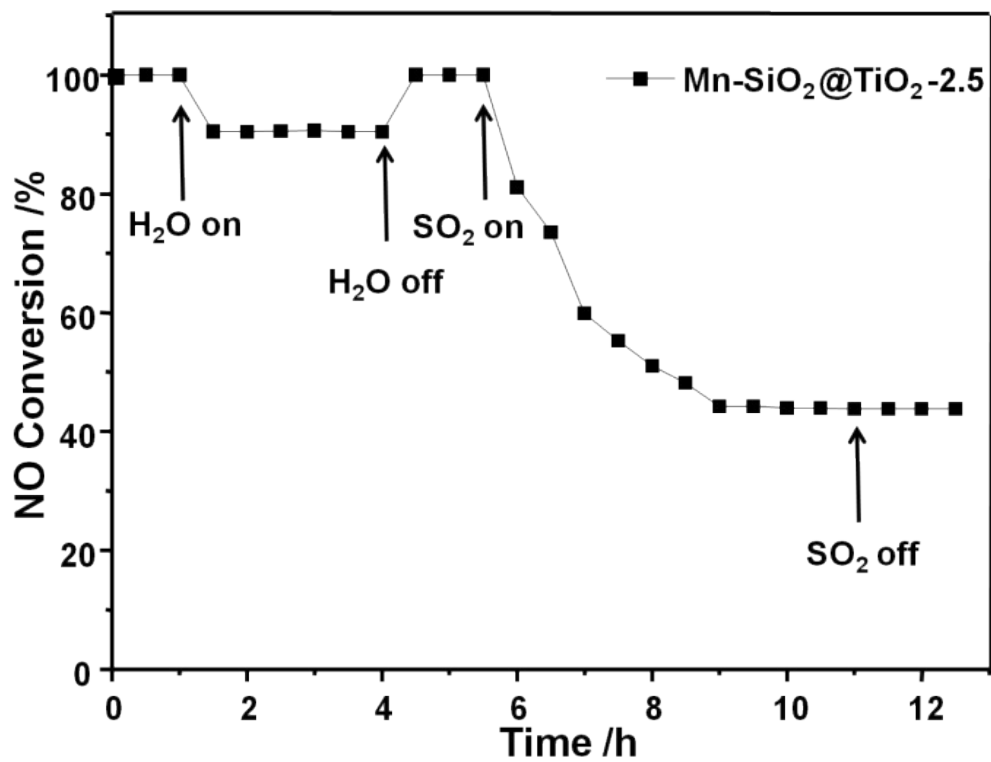

**Fig. S3** SO<sub>2</sub> and H<sub>2</sub>O poisoning effect on the NO conversion of Mn-SiO<sub>2</sub>@TiO<sub>2</sub>-2.5 catalyst. Reaction conditions: [NO]= [NH<sub>3</sub>]=1000ppm, [O<sub>2</sub>]=5%, [H<sub>2</sub>O]=5 vol% (when used), [SO<sub>2</sub>]=200ppm (when used), balance N<sub>2</sub>, GHSV=30000h<sup>-1</sup>

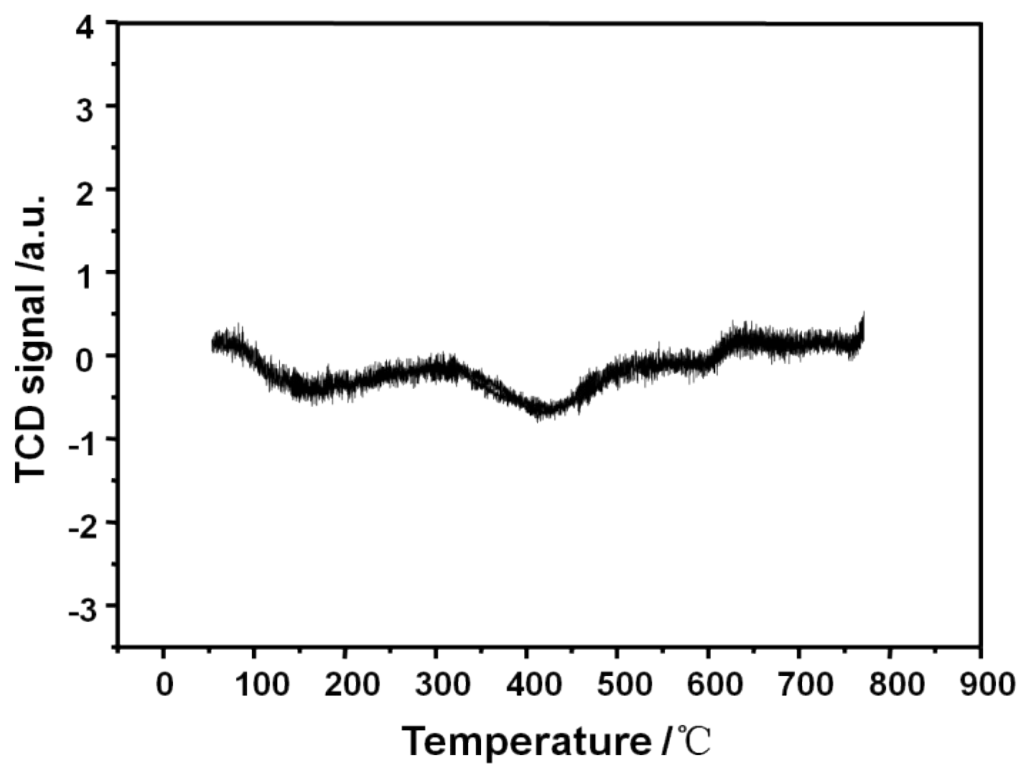

**Fig. S4** TCD signal of Mn-SiO<sub>2</sub>@TiO<sub>2</sub>-2.5 catalyst saturated in He from 50-800 °C

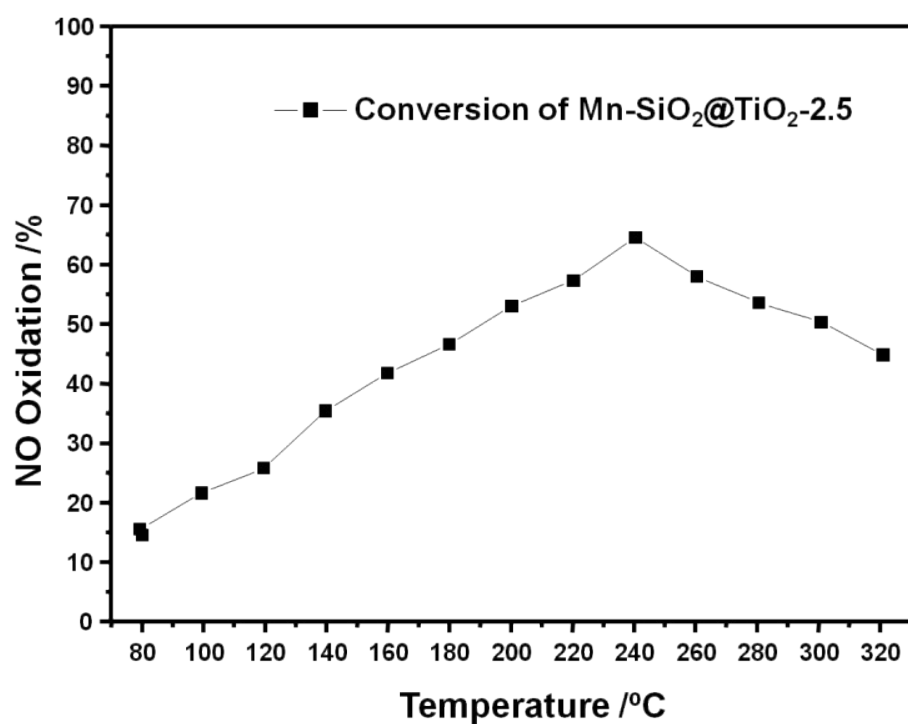

**Fig. S5** The NO conversion to NO<sub>2</sub> of the Mn-SiO<sub>2</sub>@TiO<sub>2</sub>-2.5 catalyst. Reaction conditions: [NO]=1000ppm, [O<sub>2</sub>]=5%, balance N<sub>2</sub>, GHSV=30000h<sup>-1</sup>



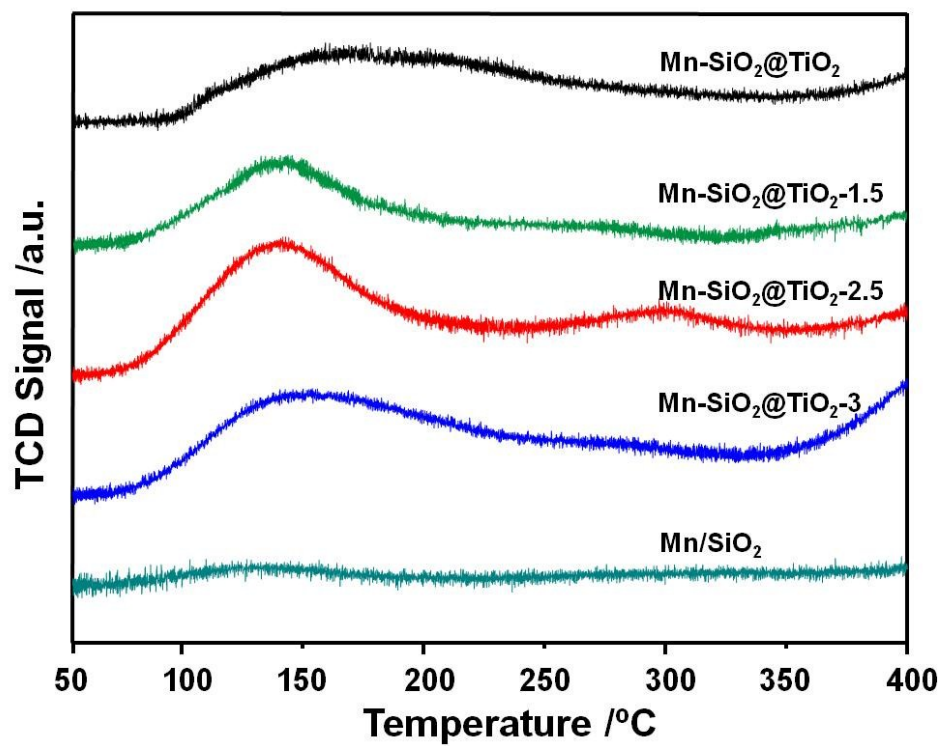

Fig. S6 NO-TPD profiles of the Mn-based nano-cup catalysts
